# Supplementary material for: A novel ligand with –NH2 and –COOH-decorated Co/Fe-based oxide for an efficient overall water splitting: dual modulation roles of active sites and local electronic structure
Source: Royal Society of Chemistry journal article supplement (doi:10.1039/d0cy01109f), 2020-01-01
Supplement: d0cy01109f1.pdf [file d0cy01109f1.pdf]

**A novel ligand with -NH<sub>2</sub> and -COOH-decorated Co/Fe-based oxide  
for efficient overall water splitting: dual modulation roles of active  
sites and local electronic structure**

*Yalan Zhang<sup>a</sup>, Zebin Yu<sup>\*a</sup>, Ronghua Jiang<sup>b</sup>, Jung Huang<sup>c</sup>, Yanping Hou<sup>a</sup>, Fei Yang<sup>d</sup>,  
Boge Zhang<sup>a</sup>, Yiyi Huang<sup>a</sup>, Bo Ye<sup>a</sup>, Runzhi Zhang<sup>a</sup>*

<sup>a</sup> School of Resources, Environment and Materials, Guangxi University, Nanning  
530004, P. R. China

<sup>b</sup> School of Chemical and Environmental Engineering, Shaoguan University,  
Shaoguan 512005, P. R. China

<sup>c</sup> College of Civil Engineering and Architecture, Guangxi University, Nanning 530004,  
P. R. China

<sup>d</sup> Guangzhou Institution Energy Testing, Guangzhou 510170, Guangzhou, P. R. China

\* Corresponding author. Tel./fax.: + 8613877108420

E-mail: [xxzx7514@hotmail.com](mailto:xxzx7514@hotmail.com) (Z. Yu)

## **Experimental section**

### ***1. Synthesis of (MOF(Co/Fe/COOH)) electrode***

Synthesis of MOF(Co/Fe/COOH) on NF. 400 mg of terephthalic acid was dissolved in 40 mL DMF and the resulting solution was transferred into a 50 mL Teflon-lined stainless-steel autoclave. The CoFe NWs on the NF were submerged into the above solution, heated at 160 °C for 12 h in an electric oven and then cooled down to room temperature naturally.

### ***2. Synthesis of Co-MOF electrode***

Synthesis of precursor on NF. The commercial NF was successively cleaned with ethanol, acetone, and ethanol for 30 min each. The growth solution was prepared by dissolving 0.06 mol·L<sup>-1</sup> Cobalt (II) nitrate hexahydrate and 0.25 mol·L<sup>-1</sup> urea in 40 mL of deionized water. One piece of NF (1 × 3 cm) was submerged in the above solution and Co<sub>0.6</sub> oxide was directly grown onto the commercial NF at 100 °C for 3 h in an electric oven. The resulting Co<sub>0.6</sub> oxide was washed with ethanol twice and dried in a vacuum oven at 50 °C overnight.

Synthesis of Co-MOF on NF. 400 mg of 2-Aminoterephthalic Acid was dissolved in 40 mL DMF and the resulting solution was transferred into a 50 mL Teflon-lined stainless-steel autoclave. The Co<sub>0.6</sub> oxide on the NF was submerged into the above solution, heated at 160 °C for 12 h in an electric oven and then cooled down to room temperature naturally.

### ***3. Synthesis of Fe-MOF electrode***

Synthesis of precursor on NF. The commercial NF was successively cleaned with ethanol, acetone, and ethanol for 30 min each. The growth solution was prepared by dissolving  $0.03 \text{ mol}\cdot\text{L}^{-1}$  Iron (III) nitrate nonahydrate, and  $0.25 \text{ mol}\cdot\text{L}^{-1}$  urea in 40 mL of deionized water. One piece of NF ( $1 \times 3 \text{ cm}$ ) was submersed in the above solution, and Fe oxide was directly grown onto the commercial NF at  $100 \text{ }^\circ\text{C}$  for 3 h in an electric oven. The resulting Fe oxide was washed with ethanol twice and dried in a vacuum oven at  $50 \text{ }^\circ\text{C}$  overnight.

Synthesis of Fe-MOF on NF. 400 mg of 2-Aminoterephthalic Acid was dissolved in 40 mL DMF and the resulting solution was transferred into a 50 mL Teflon-lined stainless-steel autoclave. The Fe oxide on the NF was submersed into the above solution, heated at  $160 \text{ }^\circ\text{C}$  for 12 h in an electric oven and then cooled down to room temperature naturally.

#### ***4. Synthesis of Pt/C//RuO<sub>2</sub> electrode***

Pt/C and RuO<sub>2</sub> catalysts were fabricated by methods elaborated elsewhere. In brief, 10 mg of 20% Pt/C or RuO<sub>2</sub> was dissolved in a 2 mL solution of 0.8 mL of deionized water, 1.08 mL of anhydrous ethanol and 0.12 mL of 5% Nafion solution. That mixture was then ultrasonicated for 30 min to form a homogeneous catalyst ink. Subsequently, 0.05 mL of the ink was loaded onto the NF 20 times using rotating deposition. Lastly, the sample was placed in an oven and dried for further testing.

#### ***5. Characterizations and electrochemical measurements***

X-ray diffraction (XRD) was conducted to analyze the crystalline phases of the samples, which was detected by a high power polycrystalline X-ray diffractometer

(DX-2700AX) at a scanning speed of  $10^\circ \text{ min}^{-1}$  over degree of  $5\text{-}85^\circ$ . The transmission electron microscopy (TEM, Titan G<sub>2</sub> ETEM) was carried out to characterize the inner structures of the catalysts. X-ray photoelectron spectroscopy (XPS) spectra was performed to gain insight into the chemical composition and binding states of the electrodes on an ESCALAB 250XI (USA) instrument with a monochromatic Al K $\alpha$  X-ray source. The electrodes surface morphologies were characterized by the field-emission scanning electron microscopy (FESEM, Hitachi SU8220) and the element compositions of the electrodes were investigated by energy-dispersive X-ray spectroscopy (EDS). Fourier transform infrared (FTIR) spectroscopy was performed using a Carry 660- FT/IR in attenuated total reflection mode (resolution=  $0.07 \text{ cm}^{-1}$ ). Atomic force microscopy (AFM) measurement was conducted on a Bruker edge. To test different vibrational modes of the sample, Raman spectroscopy characterization was carried out using a Leica DM 2700 microscope with an excitation wavelength of 532 nm. Resistivity testing was performed by a high precision resistivity tester (YAOS) with Four-probe method. Inductively coupled plasma atomic emission spectroscopy (ICP-AES, CAMT 2000 Thermo Fisher Scientific) was used to determine Co and Fe loading amount on the electrodes.

All electrochemical measurements were conducted using the electrochemical workstation (CHI 660EZ, China) with a typical three-electrode system, in which with the  $\sigma$ -Fe/Co-N-ligand(COOH) or contrast material as the working electrode, a platinum gauze electrode as the counter electrode, a Hg| HgO | OH<sup>-</sup> electrode as the reference, and  $1 \text{ mol}\cdot\text{L}^{-1}$  KOH as the electrolyte. Before electrochemical tests, the

electrolyte was purged with N<sub>2</sub> for 30 min to remove O<sub>2</sub>. All the potentials in our work were calculated relative to RHE, according to the Nernst equation:

$$E(\text{RHE}) = E(\text{vs. Hg} | \text{HgO} | \text{OH}^-) + 0.059 \times \text{pH} + 0.098 \text{V} = E(\text{vs. Hg} | \text{HgO} | \text{OH}^-) + 0.924 \text{V}. \quad (1)$$

Linear sweep voltammetry (LSV) polarization curves for OER and HER were conducted with a scan rate of 1 mV s<sup>-1</sup> and 5 mV s<sup>-1</sup> with 95% IR compensation. Long-term durability was tested at the current density of 70 mA cm<sup>-2</sup> or 50 mA cm<sup>-2</sup> for 100 h by chronopotentiometry (V-t curve). Long-term test of HER and OER was determined by chronoamperometry (it) for 2 h, respectively. Electrochemical impedance spectroscopy (EIS) test was performed within the frequency range of 100 kHz~1 Hz with AC potential amplitude of 5 mV. The electrical double-layer specific capacitances (C<sub>dl</sub>) of the electrodes were characterized by conducting cyclic voltammogram (CV) with various scan rates of 40, 60, 80, 100, 120 and 140 mV s<sup>-1</sup> at non-Faradaic region within the potential range from 0.54 V to 0.67 V (vs. RHE).

The electrochemically active surface areas (ECSA) was determined by CV at the potential window 0.54 V to 0.67 V (vs. RHE) with different scanning rate of 40, 60, 80, 100, 120 and 140 mV s<sup>-1</sup>. By plotting the difference between the anodic and cathodic current densities ( $\Delta j = j_a - j_c$ ) at 0.609 V (vs. RHE) against the scan rates, the resulting linear slope is twice of the double layer capacitance (C<sub>dl</sub>), which can be used to represent ECSA. The specific capacitance can be converted into the ECSA using the specific capacitance value for a flat standard electrode with 1 cm<sup>2</sup> of real surface

area ( $C_s$ ), and  $C_s$  is generally in the range of 20 to 60  $\mu\text{F cm}^{-2}$ . Here we use the average value of 40  $\mu\text{F cm}^{-2}$  per  $\text{cm}_{\text{ECSA}}^2$  to calculate the ECSA (Equation 2).

$$\text{ECSA} = C_{\text{dl}} / C_s \quad (2)$$

Mass activity ( $j_m$ ,  $\text{A g}^{-1}$ ) is evaluated at an overpotential of  $\eta = 300$  mV. The mass activity is calculated from the catalyst loading  $m$  ( $0.32 \text{ mg cm}_{\text{geo}}^{-2}$ ) and the measured current density  $j_{\text{geo}}$  ( $\text{mA cm}_{\text{geo}}^{-2}$ ) (Equation 3):

$$j_m = j_{\text{geo}} / m \quad (3)$$

Specific activity ( $j_s$ ,  $\mu\text{A cm}_{\text{ECSA}}^{-2}$ ) is evaluated at an overpotential of  $\eta = 300$  mV. The specific activity measured current density  $j_s$  ( $\mu\text{A cm}_{\text{ECSA}}^{-2}$ ) (Equation 4):

$$j_s = 1000 j_{\text{geo}} S / \text{ECSA} \quad (4)$$

Details concerning the calculation of TOF are shown as below. The values of TOF are calculated assuming that all Co and Ni ions in the catalysts are active and contribute to the catalytic reaction (the lowest TOF values were calculated)

$$\text{TOF} = jS / (4Fn) \quad (5)$$

Here,  $j$  ( $\text{A/cm}^2$ ) is the measured current density at an overpotential of 300 mV;  $S$  ( $\text{cm}^2$ ) is the surface area; the number of 4 means 4 electrons transfer in OER;  $F$  is Faraday constant ( $96485.3 \text{ C mol}^{-1}$ ), and  $n$  is the metal ions molar number calculated from ICP results of the as-prepared catalysts.

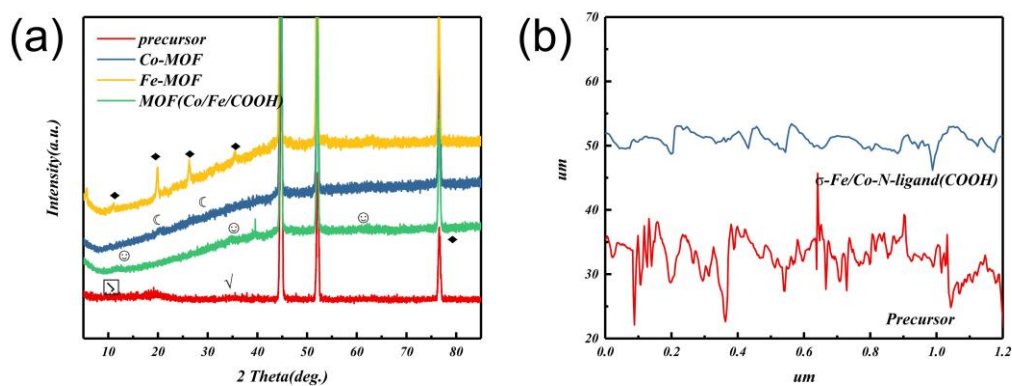

**Figure S1** (a) XRD patterns of the Co-MOF, Fe-MOF and MOF(Co/Fe/COOH), (b) AFM image corresponding height profiles of  $\sigma$ -Fe/Co-N-ligand(COOH) and precursor.

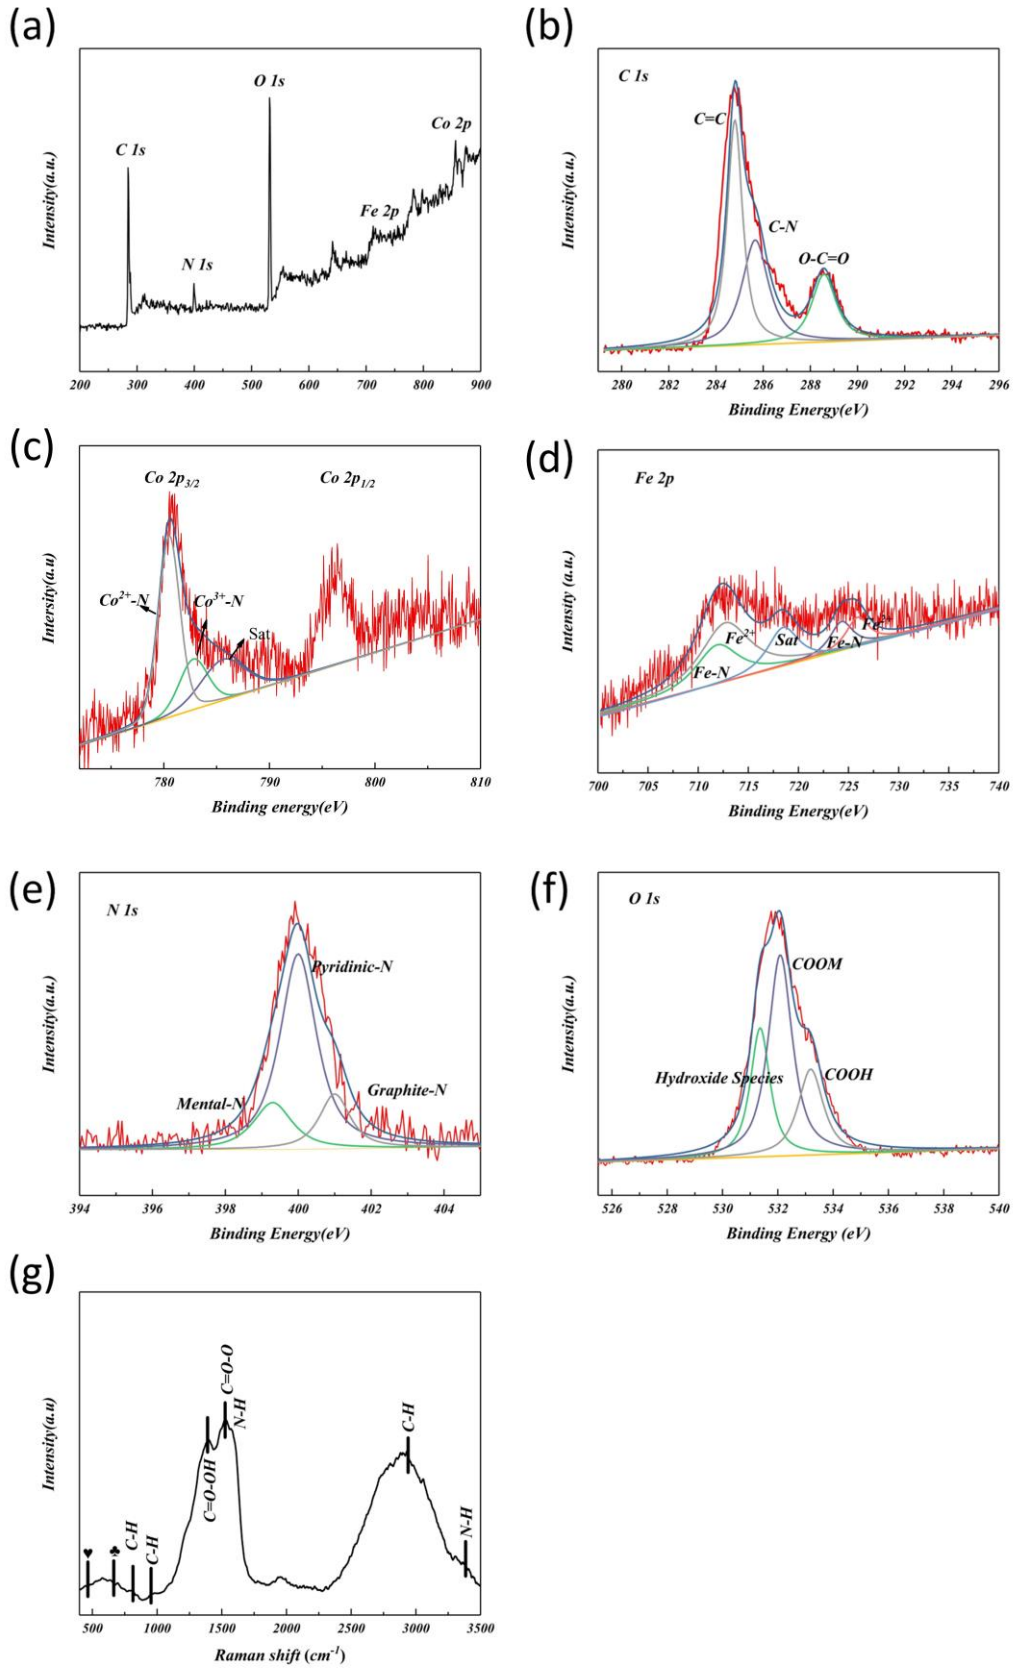



**Figure S2** XPS spectra of the  $\sigma$ -Fe/Co-N-ligand(COOH) catalyst. (a) Overall XPS spectrum, (b) C 1s, (c) Co 2p, (d) Fe 2p, (e) N 1s and (f) O 1s. (g) Raman spectra of  $\sigma$ -Fe/Co-N-ligand(COOH).

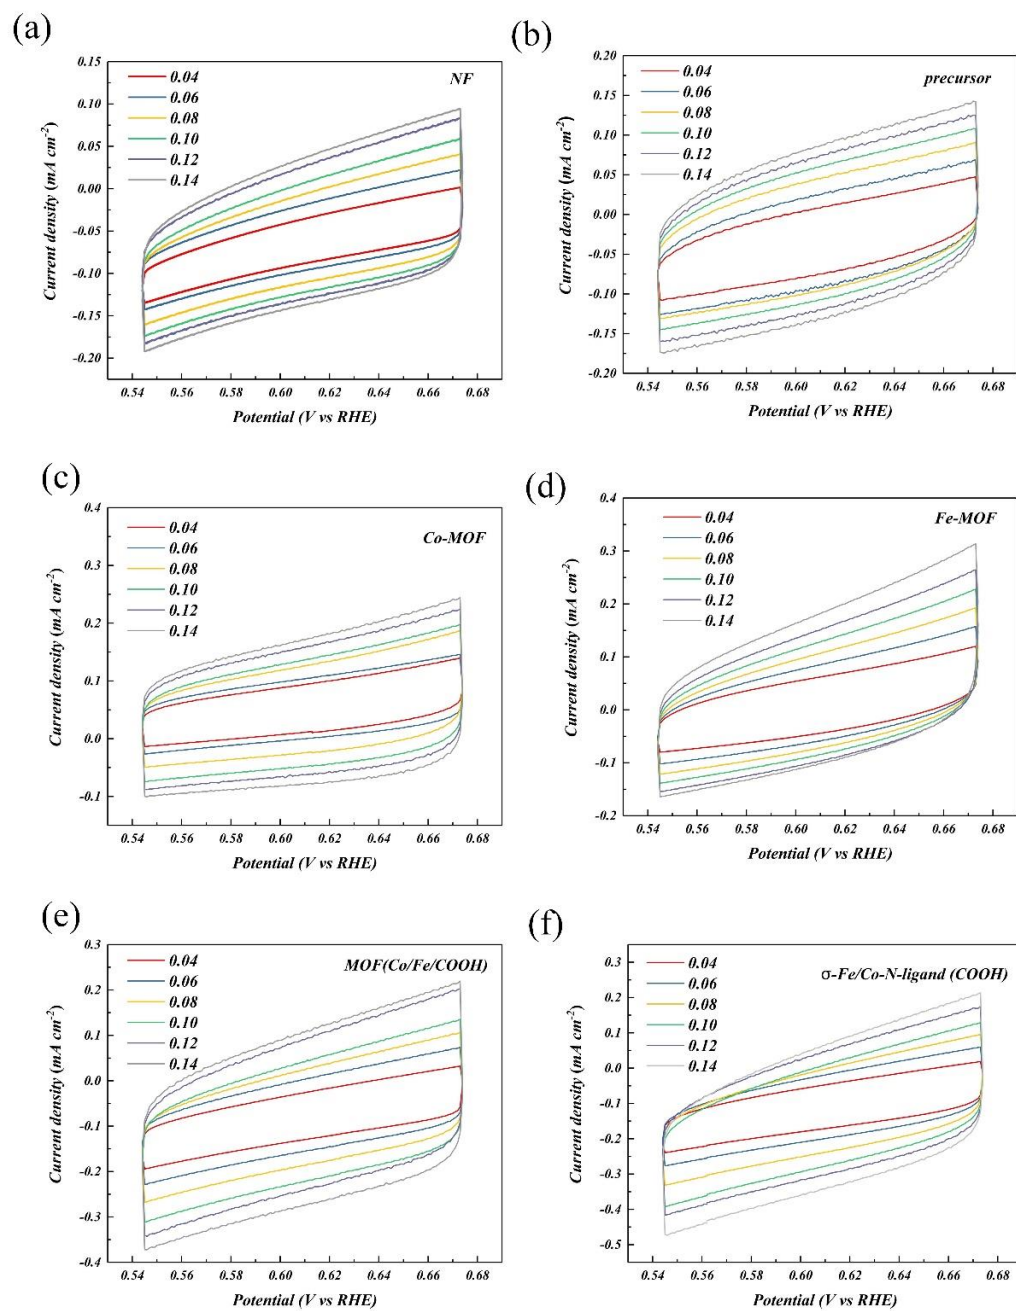

**Figure S3** Capacitance study of the prepared of different samples. (a) NF, (b)

precursor, (c) Co-MOF, (d) Fe-MOF, (e) MOF(Co/Fe/COOH) and (f)  $\sigma$ -Co/Fe-N-ligand(COOH); the corresponding CVs measured at different scan rates from 40 to 140 mV s<sup>-1</sup> current density at 0.609 V (vs. RHE) was plotted vs. scan rate.

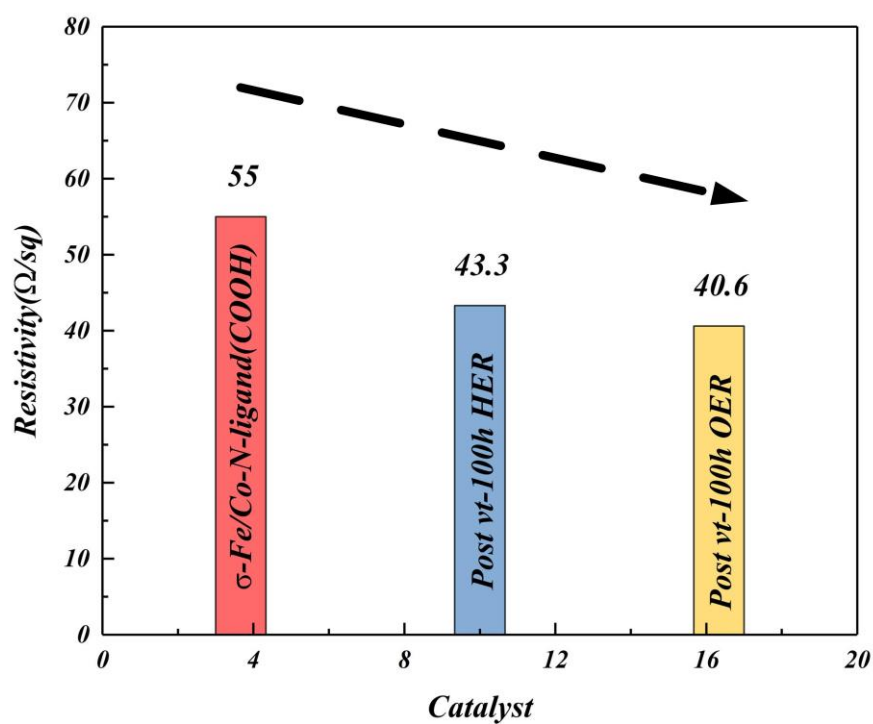

**Figure S4** Averaged results of the four-point probe resistivity measurement of the assynthesized  $\sigma$ -Fe/Co-N-ligand(COOH) as well as the after vt-100 h catalytic experim

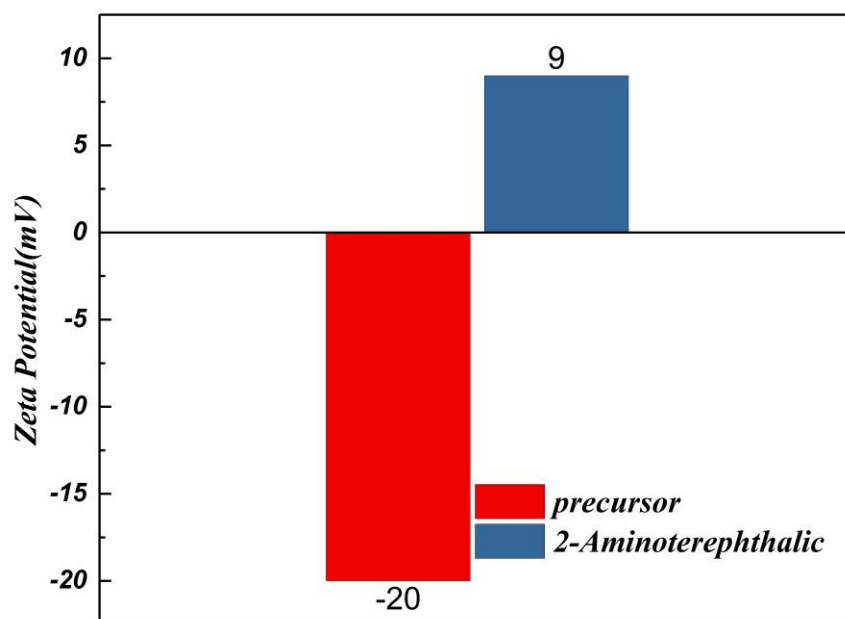

**Figure S5** The zeta potential of precursor and 2-Aminoterephthalic Acid in water.

The testing dispersion was prepared by bath ultrasonication (1 h) of precursor (1 cm<sup>2</sup>) and 2-Aminoterephthalic Acid (5 mg) in deionized water (2 mL), respectively.

After Vt-100 h

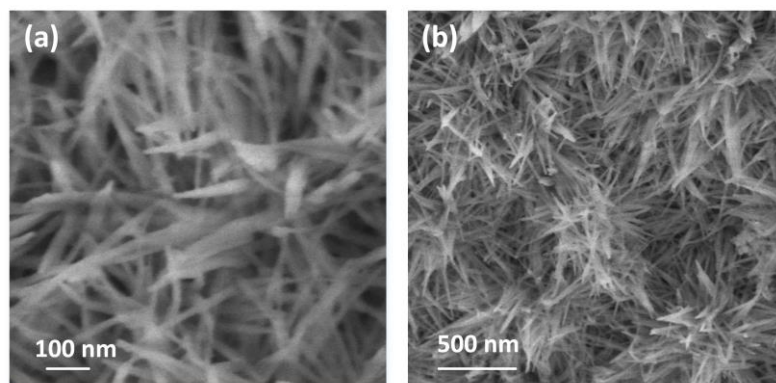

**Figure S6** SEM patterns of after the 100 h V-t curve reaction  $\sigma$ -Fe/Co-N-ligand(COOH).

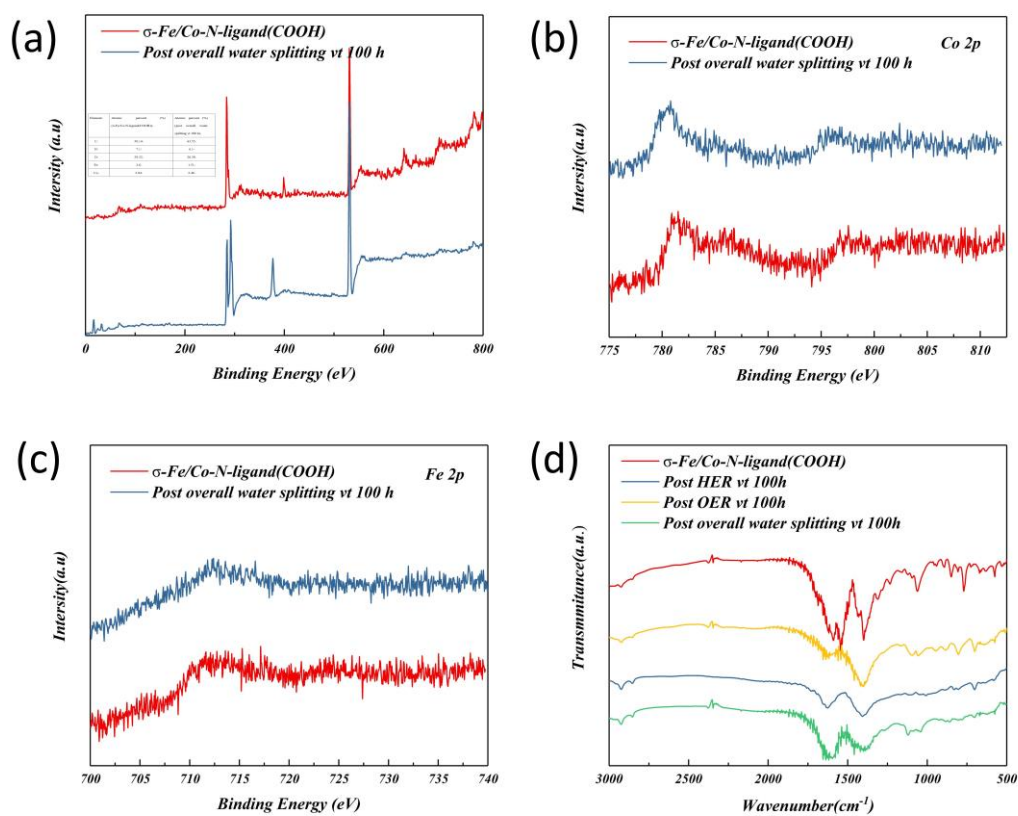

**Figure S7** Stability study. (a-c) XPS patterns of after the 100 h V-t reaction  $\sigma$ -Fe/Co-N-ligand(COOH). (d) FTIR spectra.

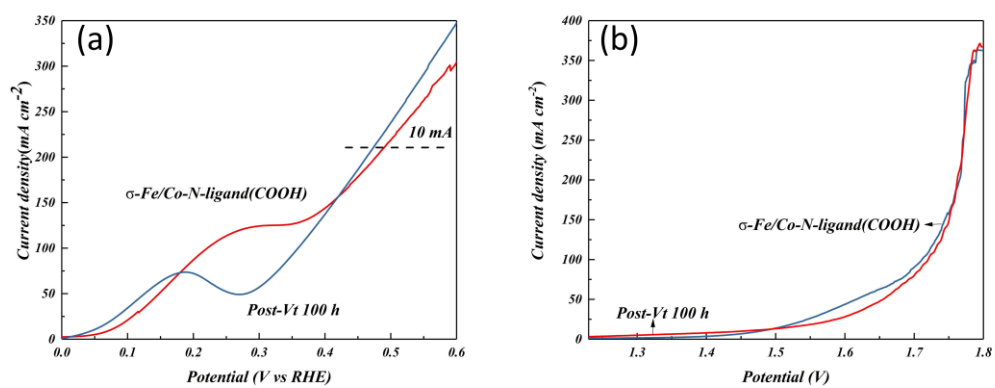

**Figure S8** (a) OER LSV curves and (b) LSV curves of two-electrode cell at a scan rate of 5 mV/s.

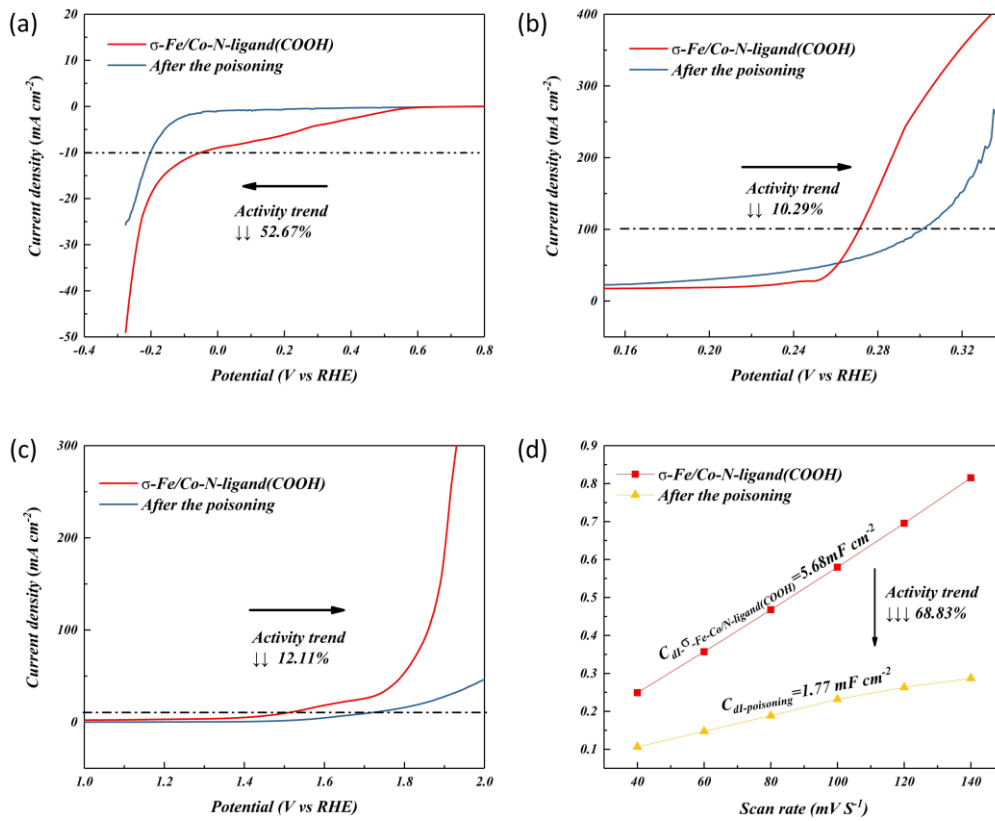

**Figure S9** Metal toxicology study of  $\sigma$ -Co/Fe-N-ligand(COOH). (a) LSV profiles at 1 mV/s for HER. (b) LSV profiles at 1 mV/s for OER. (c) LSV profiles in two-electrode electrolyzer at 1 mV/s. (d) Estimation of double-layer capacitances ( $C_{dl}$ ).



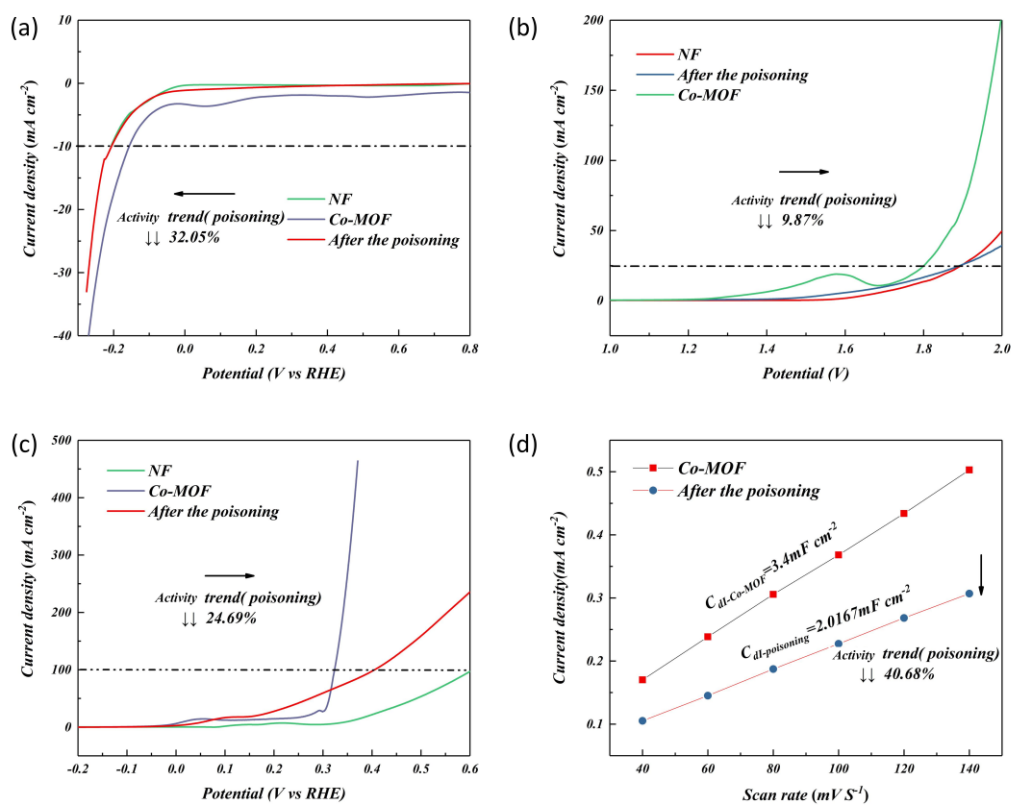

**Figure S10** Metal toxicology study of Co-MOF. (a) LSV profiles at 1 mV/s for HER. (b) LSV profiles at 1 mV/s for OER. (c) LSV profiles in two-electrode electrolyzer in 1.0 M aqueous KOH solution at 1 mV/s. (d) Estimation of double-layer capacitances ( $C_{dl}$ ).

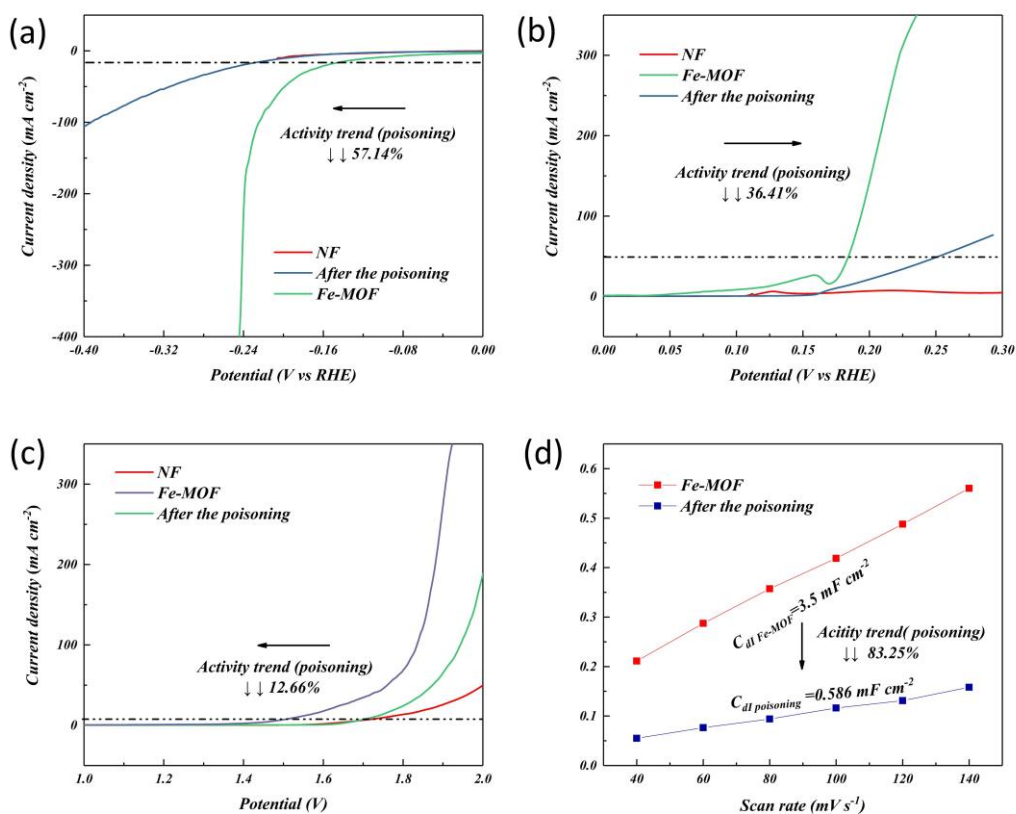

**Figure S11** Metal toxicology study of Fe-MOF. (a) LSV profiles at 1 mV/s for HER. (b) LSV profiles at 1 mV/s for OER. (c) LSV profiles in two-electrode electrolyzer in 1.0 M aqueous KOH solution at 1 mV/s. (d) Estimation of double-layer capacitances ( $C_{dl}$ ).

After  $\text{SCN}^-$  modification, the obvious HER performance is completely consistent with that of the NF. It was attributed to the poisoning of the metal and nitrogen centers. It should be noted that the overall water splitting performance is also close to that of commercial NF due to the sharp decrease in HER performance of the material and the decrease in OER performance. It is understandable that the overall water splitting performance of such material assembled as a bifunctional catalyst is not ideal.

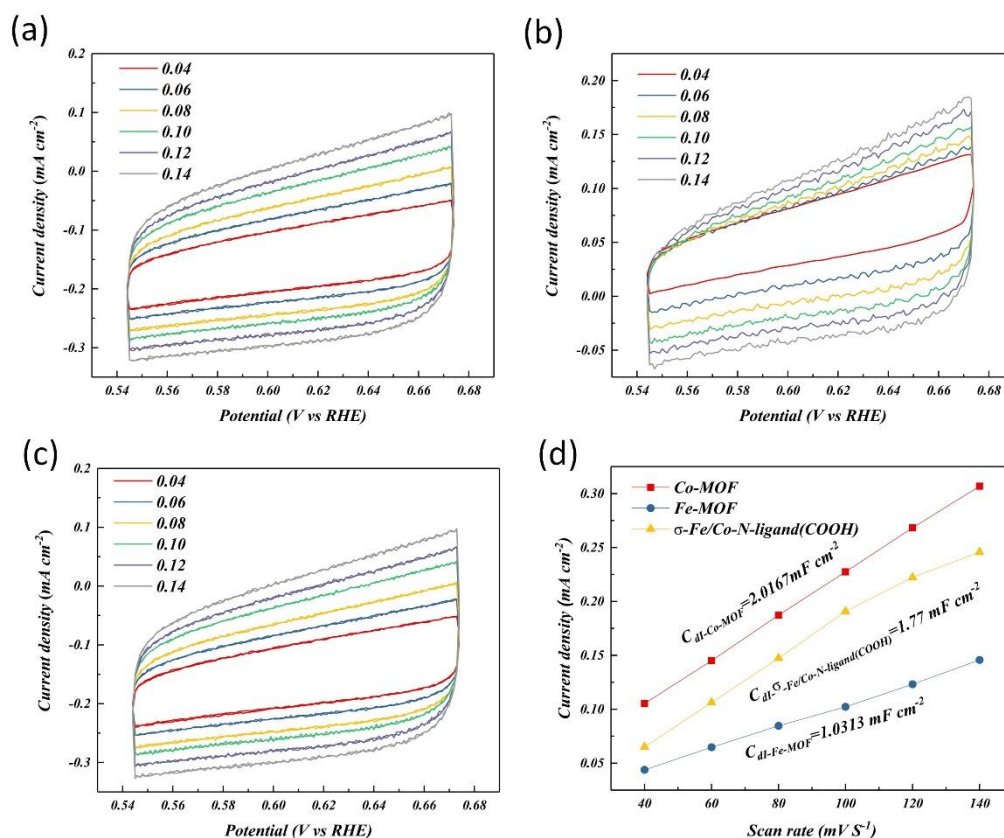

**Figure S12** Capacitance study of the prepared of different samples. (a) Co-MOF after the poisoning, (b) Fe-MOF after the poisoning and (c)  $\sigma$ -Co/Fe-N-ligand(COOH) after the poisoning, the corresponding CVs measured at different scan rates from 40 to 140  $\text{mV s}^{-1}$  current density at 0.609 V (vs. RHE) was plotted vs. scan rate. (d) Estimation of double-layer capacitances ( $C_{dl}$ ) by plotting the current density variation ( $\Delta j = (j_a - j_c)/2$ ), obtained from the (a)-(c) at 0.609 V vs RHE.

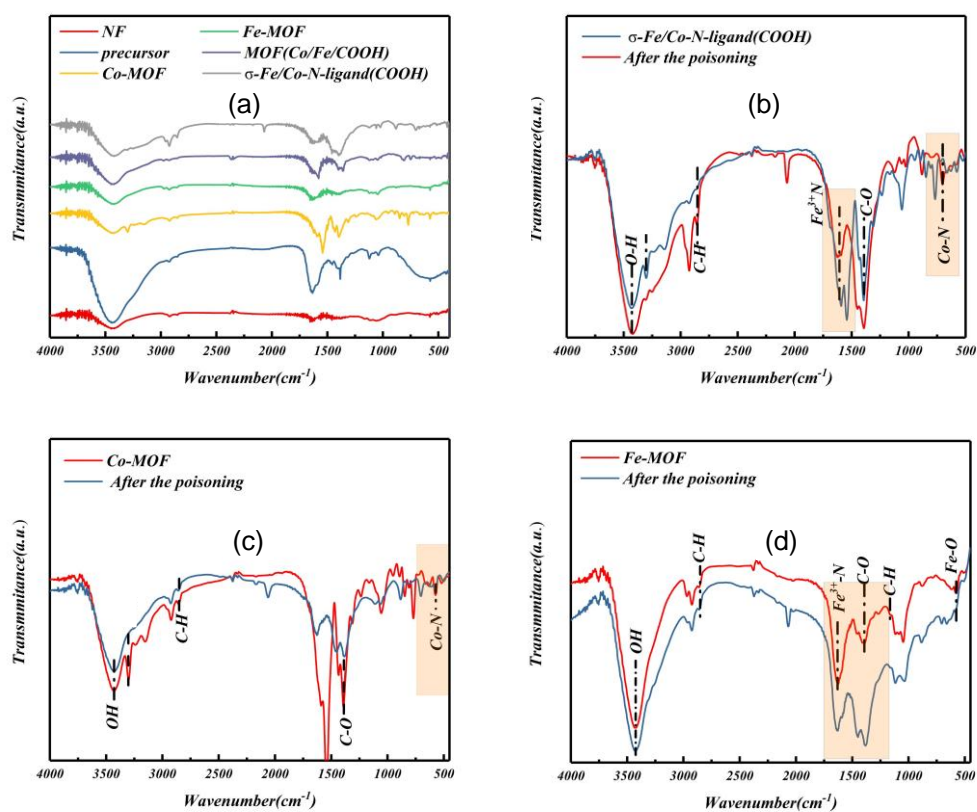

**Figure S13** Metal toxicology study of  $\sigma$ -Co/Fe-N-ligand(COOH), Co-MOF and Fe-MOF. (a) The FTIR spectra of  $\sigma$ -Fe/Co-N-ligand(COOH), MOF(Co/Fe/COOH), Co-MOF, Fe-MOF, precursor, NF. Compare the MOF and after the poisoning (b-d) the FT-IR spectra of  $\sigma$ -Fe/Co-N-ligand(COOH), Co-MOF and Fe-MOF.

**Table. S1. Summary of ICP results of  $\sigma$ -Fe/Co-N-ligand(COOH) and contrast material.**

| Samples                        | Co/Fe ratio in reactants | Metal content(Co+Fe) in MOF wt% |
|--------------------------------|--------------------------|---------------------------------|
| precursor                      | 17:59                    | 5.73%                           |
| Co-MOF                         | —                        | 4.3%                            |
| Fe-MOF                         | —                        | 1.85%                           |
| MOF(Co/Fe/COOH)                | 39:35                    | 1.88%                           |
| $\sigma$ -Fe/Co-N-ligand(COOH) | 17:28                    | 1.13%                           |

**Table. S2. EIS of  $\sigma$ -Fe/Co-N-ligand(COOH) and contrast material.**

| Samples                        | Rs( $\Omega$ ) | Error  | Error  | C(mF)  | Error     | Error  | Rct( $\Omega$ ) | Erro  | Error |
|--------------------------------|----------------|--------|--------|--------|-----------|--------|-----------------|-------|-------|
|                                |                |        | %      |        |           | %      | )               | r     | %     |
| NF                             | 1.326          | 0.0658 | 4.9687 | 0.6988 | 3.241E-05 | 4.6512 | 261.1           | 3.179 | 6.537 |
|                                |                | 8      |        | 5      |           |        |                 |       |       |
| Precursor                      | 1.072          | 0.0484 | 4.5159 | 1.4041 | 7.8996E-0 | 5.6261 | 135.4           | 6.509 | 9.578 |
|                                |                | 1      |        |        | 5         |        |                 |       |       |
| Co-MOF                         | 0.915          | 0.0282 | 3.0889 | 2.4136 | 9.3882E-0 | 3.897  | 125.6           | 4.781 | 9.73  |
|                                |                | 6      |        |        | 5         |        |                 |       |       |
| Fe-MOF                         | 1.238          | 0.0383 | 3.1007 | 6.601  | 0.0003152 | 4.4328 | 28.99           | 3.853 | 3.291 |
|                                |                | 8      |        |        | 1         |        |                 |       |       |
| MOF(Co/Fe/COOH)                | 1.006          | 0.0351 | 3.4954 | 1.9152 | 8.7476E-0 | 4.5675 | 106.1           | 7.6   | 6.588 |
|                                |                | 6      |        |        | 5         |        |                 |       |       |
| $\sigma$ -Fe/Co-N-ligand(COOH) | 0.980          | 0.0280 | 2.8619 | 2.5524 | 0.0001006 | 3.9426 | 90              | 3.942 | 9.573 |
|                                |                | 8      |        |        | 3         |        |                 |       |       |

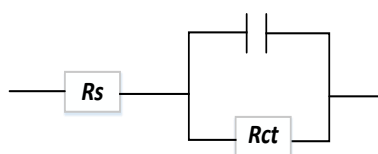

**Table. S3. Comparison of performance of MOF and MOF derivatives as bifunctional electrocatalysts for overall water splitting in alkaline environments.**

| Samples                                | Electrolytes<br>(HER)                | HER<br>(mV) | $\eta_a$ | OER $\eta_b$<br>(mV) | Overall water splitting<br>cell voltage <sup>c</sup> (V) | Overall<br>water<br>splitting<br>work<br>life(h) | Ref          |
|----------------------------------------|--------------------------------------|-------------|----------|----------------------|----------------------------------------------------------|--------------------------------------------------|--------------|
| $\sigma$ -Fe/Co-N-ligand (COOH)        | 1M KOH                               | 128         |          | 60                   | 1.468                                                    | 100                                              | This<br>work |
| CuRu-MOF                               | 0.5 M H <sub>2</sub> SO <sub>4</sub> | 61.6        |          | 31                   | 1.53                                                     | 24                                               | 1            |
| NH <sub>2</sub> -MIL<br>(MOF)          | 88B(Fe <sub>2</sub> Ni)-<br>1M KOH   | 87          |          | 240                  | 1.56                                                     | 30                                               | 2            |
| Co/CoN/Co <sub>2</sub> P-NPC           | 1M KOH                               | 99          |          | 272                  | 1.60                                                     | 48                                               | 3            |
| Co <sub>3</sub> S <sub>4</sub> /EC-MOF | 1M KOH                               | 84          |          | 226                  | 1.55                                                     | 12                                               | 4            |
| Mo-CoP                                 | 1M KOH                               | 96          |          | 305                  | 1.56                                                     | 20                                               | 5            |
| Fe-Ni@NC-CNTs                          | 1M KOH                               | 274         |          | 202                  | 1.98<br>at<br>145 mA cm <sup>-2</sup>                    | 40000s                                           | 6            |
| NF@Ni/C-600                            | 1M KOH                               | 33          |          | 265                  | 1.60 at<br>35.9 mA cm <sup>-2</sup>                      | 70                                               | 7            |
| CoPO                                   | 1M KOH                               | 158         |          | 280                  | 1.52                                                     | 10                                               | 8            |
| Co/NBC                                 | 1M KOH                               | 117         |          | 302                  | 1.68                                                     | 40000s                                           | 9            |
| NiCoSe/C                               | 1M KOH                               | 143         |          | 249                  | 1.68                                                     | 20                                               | 10           |

## Reference

1. T. Qiu, Z. Liang, W. Guo, S. Gao, C. Qu, H. Tabassum, H. Zhang, B. Zhu, R. Zou and Y. Shao-Horn, *Nano Energy*, 2019, **58**, 1-10.
2. D. Senthil Raja, X.-F. Chuah and S.-Y. Lu, *Adv. Energy Mater.*, 2018, **8**.
3. L. Hu, Y. Hu, R. Liu, Y. Mao, M. S. Balogun and Y. Tong, *Int. J. Hydrog. Energy*, 2019, **44**, 11402-11410.
4. T. Liu, P. Li, N. Yao, T. Kong, G. Cheng, S. Chen and W. Luo, *Adv. Mater.*, 2019, **31**, e1806672.
5. C. Guan, W. Xiao, H. Wu, X. Liu, W. Zang, H. Zhang, J. Ding, Y. P. Feng, S. J. Pennycook and J. Wang, *Nano Energy*, 2018, **48**, 73-80.
6. X. Zhao, P. Pachfule, S. Li, J. R. J. Simke, J. Schmidt and A. Thomas, *Angew. Chem. Int. Ed. Engl.*, 2018, **57**, 8921-8926.
7. H. Sun, Y. Lian, C. Yang, L. Xiong, P. Qi, Q. Mu, X. Zhao, J. Guo, Z. Deng and Y. Peng, *Energ. Environ. Sci.*, 2018, **11**, 2363-2371.
8. G. Anandhababu, Y. Huang, D. D. Babu, M. Wu and Y. Wang, *Adv. Funct. Mater.*, 2018, **28**.
9. M.-R. Liu, Q.-L. Hong, Q.-H. Li, Y. Du, H.-X. Zhang, S. Chen, T. Zhou and J. Zhang, *Adv. Funct. Mater.*, 2018, **28**.
10. Z. Chen, B. Xu, X. Yang, H. Zhang and C. Li, *Int. J. Hydrog. Energy*, 2019, **44**, 5983-5989.
